# Supplementary material
Source: PubMed Central journal article supplement (PMC10993166)
Supplement: jama-e242452-s005.pdf [file jama-e242452-s005.pdf]

## Data Sharing Statement

Talal. Integrated Hepatitis C–Opioid Use Disorder Care Through Facilitated Telemedicine. *JAMA*. Published April 03, 2024. doi:10.1001/jama.2024.2452

### Data

**Data available:** Yes

**Data types:** Deidentified participant data

**How to access data:** Data will be available upon request from the study PI, Dr. Andrew Talal at [ahtalal@buffalo.edu](mailto:ahtalal@buffalo.edu)

**When available:** With publication

### Supporting Documents

**Document types:** None

### Additional Information

**Who can access the data:** Researchers with a reasonable question that can be addressed by the data.

**Types of analyses:** Data will be made available for proposed analyses that can reasonably be addressed by the data and have a high likelihood of contributing to the scientific literature.

**Mechanisms of data availability:** Data will be made available after approval of a proposal outlining the intended question to be answered by the data and the proposed analyses that will be undertaken.

**Any additional restrictions:** We request that the results of these analyses be submitted for publication within 9 months of completion of the analysis.
